# Supplementary material for: The O, OH and OOH-assisted selective coupling of methanol on Au–Ag(111)
Source: Royal Society of Chemistry journal article supplement (doi:10.1039/c6cp00336b), 2016-01-01
Supplement: c6cp00336b1.pdf [file c6cp00336b1.pdf]

## Supporting Information

### **The O, OH and OOH-Assisted Selective Coupling of Methanol on Au-Ag(111)**

Wenhui Zhong,<sup>1</sup>Jinxia Liang,<sup>1</sup> Wei Hu,<sup>2</sup> Xinrui Cao,<sup>3</sup> Chuanyi Jia,<sup>1</sup> and Jun Jiang<sup>\*,2</sup>

<sup>1</sup>Guizhou Provincial Key Laboratory of Computational Nano-Material Science, Institute of Applied Physics, Guizhou Synergetic Innovation Center of Scientific Big Data for Advanced Manufacturing Technology, Guizhou Normal College, Gaoxin Road 115, Guiyang, Guizhou 550018, P. R. China;

<sup>2</sup>School of Chemistry and Materials Science, Hefei National Laboratory for Physical Sciences at the Microscale, University of Science and Technology of China (USTC), Jinzhai Road 96, Hefei, Anhui 230026, P. R. China

<sup>3</sup>Institute of Theoretical Physics, Department of Physics, Fujian Provincial Key Laboratory of Theoretical and Computational Chemistry, Xiamen University, Xiamen 361005, China

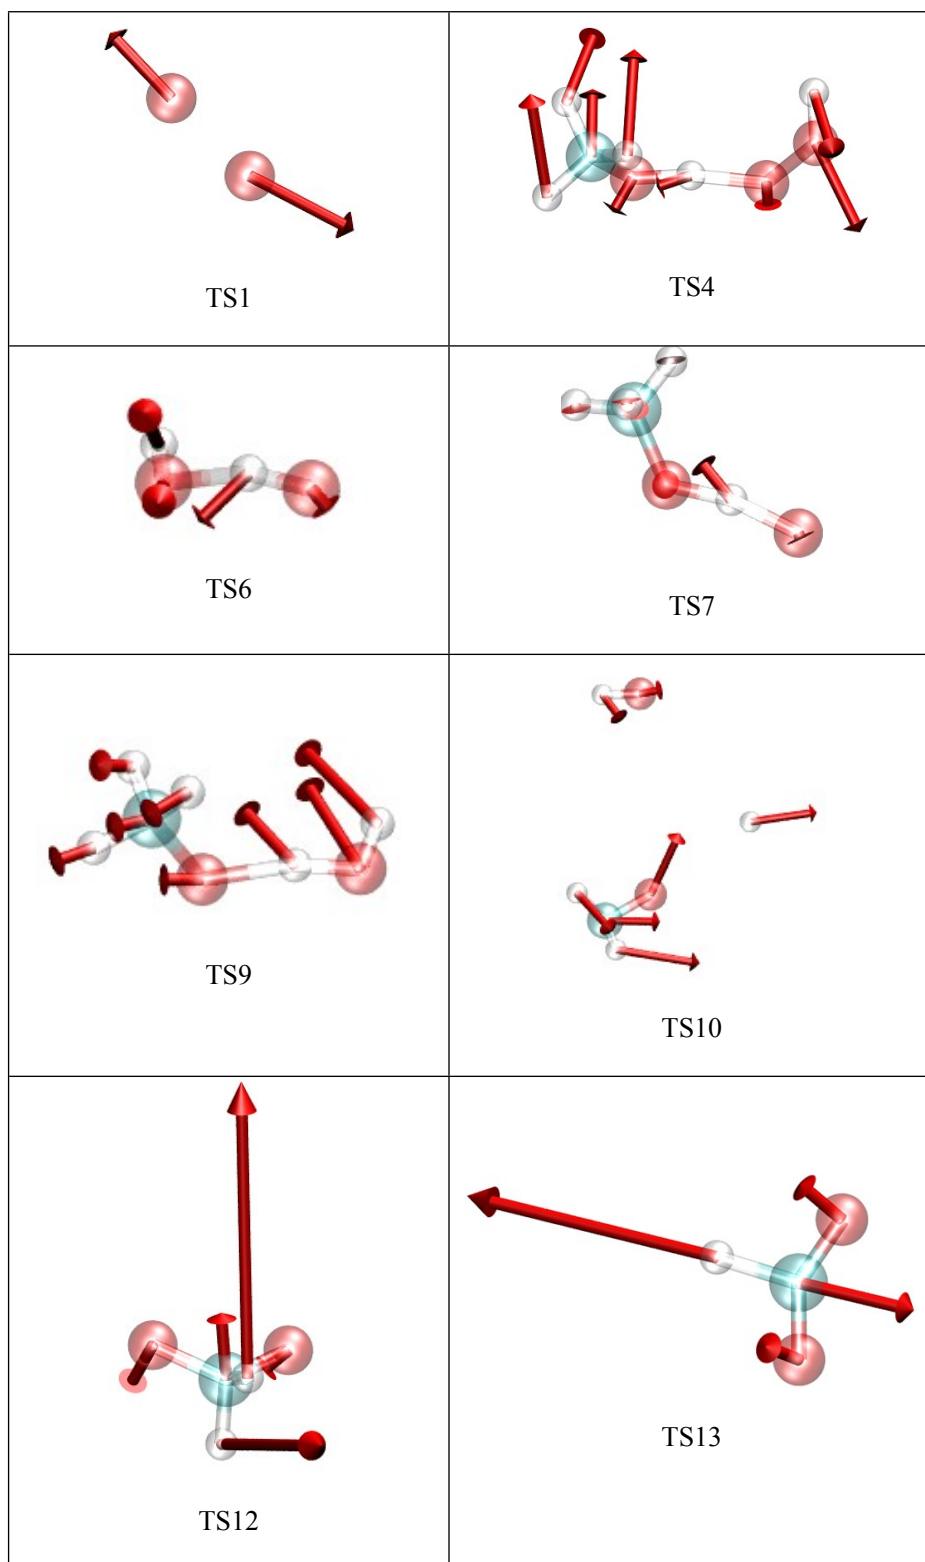

**Figure S1.** The vibrational modes of the imaginary frequency of several key transition states.
